# Supplementary material
Source: Springer Nature journal article supplement (https://hal.science/hal-01290561v1/file/13567_2013_368_MOESM2_ESM.pdf)

**BV115****A**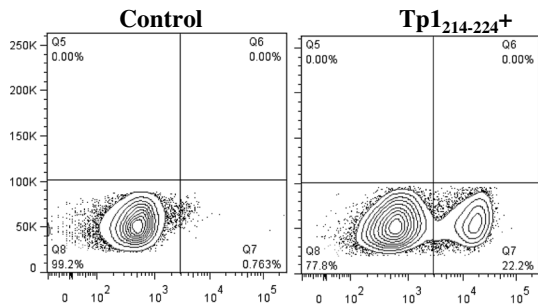**592****B**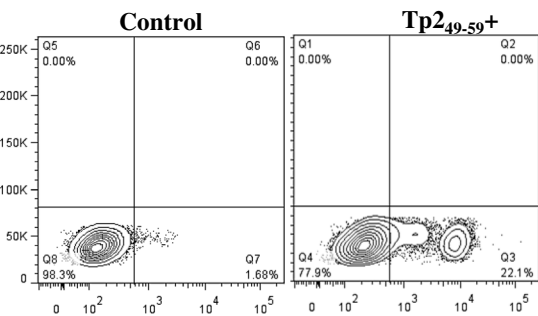**196****C**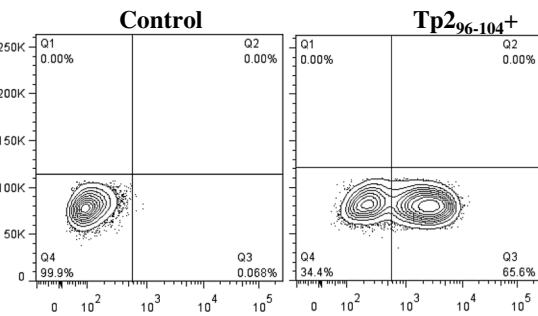

Tetramer (PE) +

Tetramer (PE) +

**BV50****D**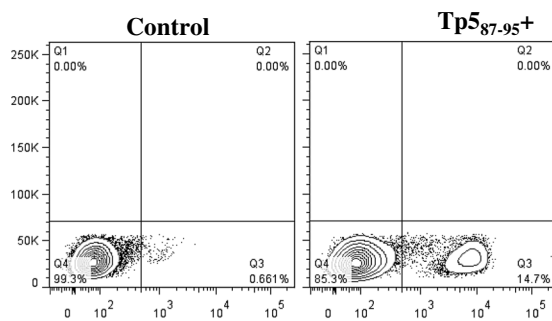**Bx63****E**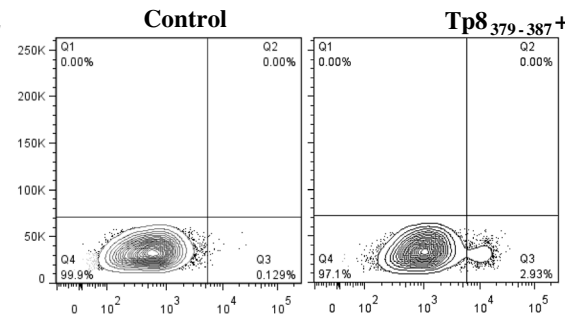**495****F**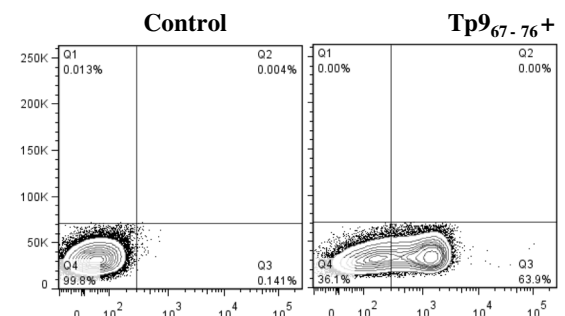

Tetramer (PE) +

Tetramer (PE) +

Supplement: MOESM2 [file 13567_2013_368_MOESM2_ESM.pdf]
